# Supplementary material
Source: PubMed Central journal article supplement (PMC6889048)
Supplement: NIHMS1053107-supplement-1.pdf [file NIHMS1053107-supplement-1.pdf]

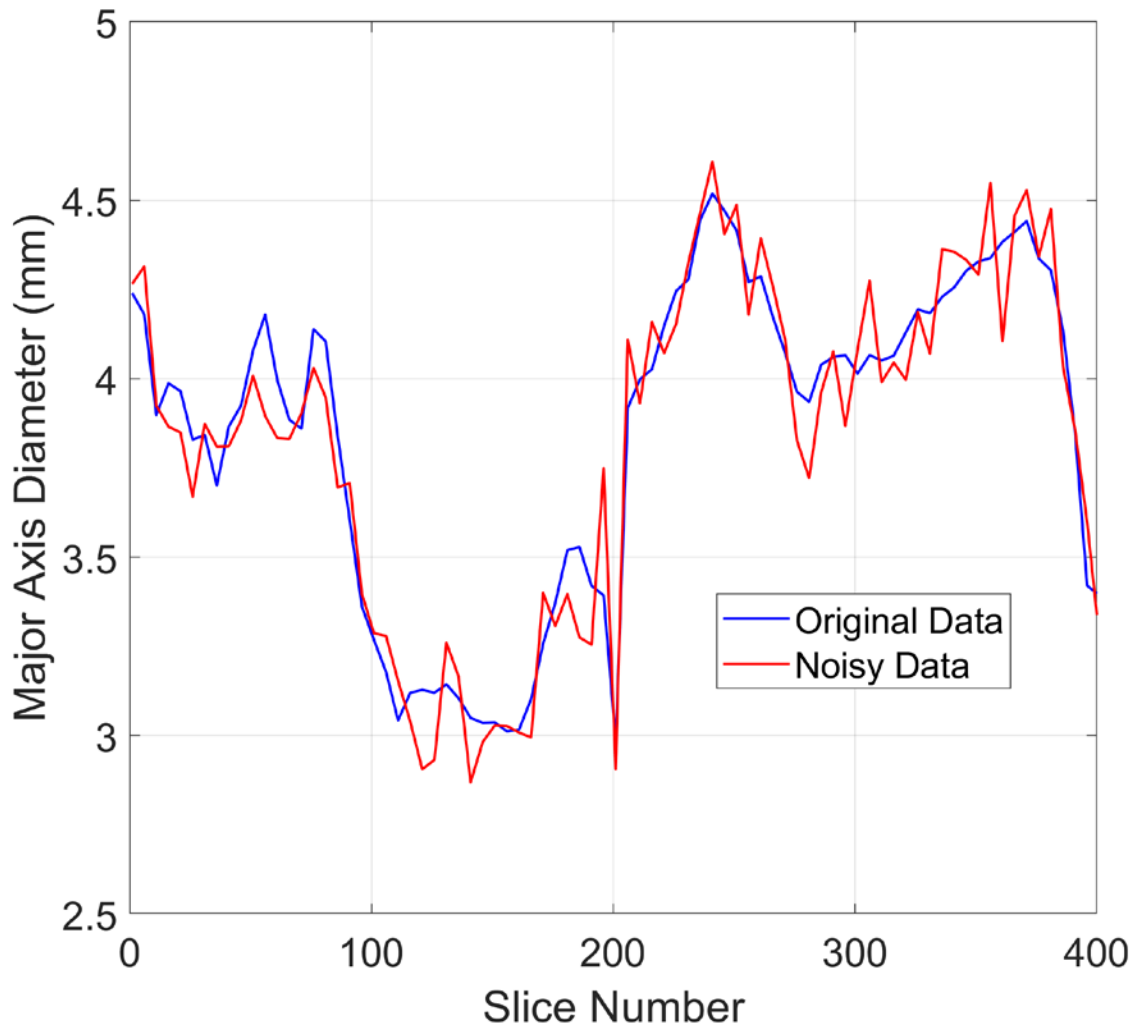

**Supplementary Figure 1. Representative plot of the experimental data and noisy data used for the *in silico* validation of the fitting method.**
